# Supplementary material for: Genetic diversity and conservation of Siberian apricot (Prunus sibirica L.) based on microsatellite markers
Source: Springer Nature journal article supplement (doi:10.1038/s41598-023-37993-2), 2023-07-11
Supplement: 41598_2023_37993_MOESM1_ESM.pdf [file 41598_2023_37993_MOESM1_ESM.pdf]

Genetic diversity and conservation of Siberian apricot (*Prunus sibirica* L.) base on microsatellite markers

Xinxin Wang <sup>1,2</sup>, Li Wang <sup>1,2</sup>, Yongqiang Sun <sup>1,2</sup>, Jianhua Chen <sup>1,2</sup>, Quangang Liu <sup>1,2</sup>, Shengjun Dong <sup>1,2\*</sup>

<sup>1</sup> College of Forestry, Shenyang Agricultural University, Shenyang, 110866, Liaoning, China

<sup>2</sup> Key Laboratory for Silviculture of Liaoning Province, Shenyang, 110866, Liaoning, China

\* Correspondence authors. E-mail addresses: dsj928@163.com (S. Dong).

Table S1 Geographical information of 176 *P. sibirica* individuals from 10 populations

| Population      | ID | Sample size | Code | Latitude (°N) | Longitude (°E) | Elevation (m) |
|-----------------|----|-------------|------|---------------|----------------|---------------|
| Kazuo, Liaoning | LK | 22          | 1    | 41.060170     | 119.852926     | 343           |
|                 |    |             | 2    | 41.060177     | 119.852702     | 343           |
|                 |    |             | 3    | 41.057379     | 119.854049     | 346           |
|                 |    |             | 4    | 41.054727     | 119.854157     | 346           |
|                 |    |             | 5    | 41.012958     | 119.781834     | 361           |
|                 |    |             | 6    | 41.013952     | 119.781727     | 361           |
|                 |    |             | 7    | 41.013217     | 119.781601     | 361           |
|                 |    |             | 8    | 41.014809     | 119.792973     | 372           |
|                 |    |             | 9    | 41.018184     | 119.793405     | 393           |
|                 |    |             | 10   | 41.060682     | 119.785585     | 408           |
|                 |    |             | 11   | 41.061443     | 119.787027     | 408           |
|                 |    |             | 12   | 41.179814     | 119.615164     | 358           |
|                 |    |             | 13   | 41.179651     | 119.618039     | 359           |
|                 |    |             | 14   | 41.178538     | 119.616817     | 359           |
|                 |    |             | 15   | 41.177832     | 119.615452     | 358           |
|                 |    |             | 16   | 41.177995     | 119.617644     | 359           |
|                 |    |             | 17   | 41.223412     | 119.515809     | 536           |
|                 |    |             | 18   | 41.221133     | 119.516384     | 536           |
|                 |    |             | 19   | 41.221547     | 119.513716     | 536           |

| Population         | ID | Sample size | Code | Latitude (°N) | Longitude (°E) | Elevation (m) |
|--------------------|----|-------------|------|---------------|----------------|---------------|
| Chaoyang, Liaoning | LC | 10          | 21   | 41.286382     | 119.563643     | 651           |
|                    |    |             | 22   | 41.283942     | 119.568387     | 699           |
|                    |    |             | 23   | 41.282980     | 119.602055     | 691           |
|                    |    |             | 26   | 41.446044     | 120.239149     | 248           |
|                    |    |             | 29   | 41.445865     | 120.239356     | 248           |
|                    |    |             | 30   | 41.445767     | 120.239432     | 248           |
|                    |    |             | 41   | 41.379036     | 120.278567     | 365           |
|                    |    |             | 42   | 41.445894     | 120.239525     | 248           |
|                    |    |             | 43   | 41.367424     | 120.260349     | 415           |
|                    |    |             | 44   | 41.371511     | 120.297647     | 556           |
| Beipiao, Liaoning  | LB | 26          | 45   | 41.445848     | 120.239607     | 248           |
|                    |    |             | 46   | 41.375653     | 120.294988     | 509           |
|                    |    |             | 48   | 41.441108     | 120.184584     | 222           |
|                    |    |             | 47   | 42.035995     | 120.910047     | 276           |
|                    |    |             | 49   | 42.035925     | 120.909378     | 276           |
|                    |    |             | 50   | 42.036009     | 120.909293     | 276           |
|                    |    |             | 53   | 42.036467     | 120.909769     | 276           |
|                    |    |             | 54   | 42.036457     | 120.909329     | 276           |
|                    |    |             | 55   | 42.036494     | 120.909050     | 276           |
|                    |    |             | 57   | 42.036451     | 120.908498     | 276           |
|                    |    |             | 58   | 42.036444     | 120.908947     | 276           |
|                    |    |             | 60   | 42.036417     | 120.909526     | 276           |
|                    |    |             | 61   | 42.036434     | 120.909957     | 276           |
|                    |    |             | 62   | 42.036434     | 120.910546     | 276           |
|                    |    |             | 63   | 42.036417     | 120.910779     | 276           |
|                    |    |             | 70   | 42.036357     | 120.908358     | 276           |

| Population               | ID  | Sample size | Code | Latitude (°N) | Longitude (°E) | Elevation (m) |
|--------------------------|-----|-------------|------|---------------|----------------|---------------|
|                          |     |             | 71   | 42.042072     | 120.908875     | 283           |
|                          |     |             | 72   | 42.036317     | 120.908857     | 276           |
|                          |     |             | 73   | 42.036110     | 120.908800     | 276           |
|                          |     |             | 81   | 42.033159     | 120.895535     | 279           |
|                          |     |             | 87   | 42.040090     | 120.906647     | 288           |
|                          |     |             | 88   | 42.045194     | 120.910567     | 283           |
|                          |     |             | 89   | 42.034974     | 120.907761     | 288           |
|                          |     |             | 91   | 42.045269     | 120.908497     | 283           |
|                          |     |             | 93   | 42.045289     | 120.908828     | 283           |
|                          |     |             | 95   | 42.040385     | 120.910636     | 276           |
|                          |     |             | 99   | 42.039769     | 120.912971     | 276           |
|                          |     |             | BF   | 42.033849     | 120.901796     | 288           |
|                          |     |             | BX   | 42.033367     | 120.906467     | 288           |
| Aohan, Inner<br>Mongolia | NA  | 10          | 25   | 42.553323     | 120.466004     | 423           |
|                          |     |             | 27   | 42.553528     | 120.465025     | 423           |
|                          |     |             | 28   | 42.553163     | 120.463776     | 423           |
|                          |     |             | 31   | 42.553356     | 120.464755     | 423           |
|                          |     |             | 32   | 42.553376     | 120.464387     | 423           |
|                          |     |             | 33   | 42.553402     | 120.464432     | 423           |
|                          |     |             | 34   | 42.553874     | 120.463857     | 423           |
|                          |     |             | 35   | 42.554790     | 120.464526     | 423           |
|                          |     |             | 36   | 42.554594     | 120.463947     | 423           |
|                          |     |             | 37   | 42.554440     | 120.463900     | 423           |
| Wadi, Inner<br>Mongolia  | NZW | 26          | 332  | 47.311528     | 122.144083     | 470           |
|                          |     |             | 334  | 47.310194     | 122.144528     | 470           |

| Population                 | ID  | Sample size | Code | Latitude (°N) | Longitude (°E) | Elevation (m) |
|----------------------------|-----|-------------|------|---------------|----------------|---------------|
|                            |     |             | 336  | 47.312250     | 122.141444     | 476           |
|                            |     |             | 339  | 47.310556     | 122.145056     | 470           |
|                            |     |             | 340  | 47.310333     | 122.145167     | 470           |
|                            |     |             | 341  | 47.309694     | 122.145083     | 470           |
|                            |     |             | 343  | 47.310000     | 122.145583     | 470           |
|                            |     |             | 345  | 47.309778     | 122.144667     | 470           |
|                            |     |             | 349  | 47.312111     | 122.140167     | 476           |
|                            |     |             | 351  | 47.312028     | 122.140028     | 476           |
|                            |     |             | 352  | 47.311028     | 122.143528     | 470           |
|                            |     |             | 354  | 47.310389     | 122.143028     | 470           |
|                            |     |             | 357  | 47.312028     | 122.140417     | 476           |
|                            |     |             | 358  | 47.312861     | 122.141389     | 476           |
|                            |     |             | 361  | 47.311667     | 122.143583     | 470           |
|                            |     |             | 362  | 47.311444     | 122.143444     | 470           |
|                            |     |             | 364  | 47.317972     | 122.247194     | 608           |
|                            |     |             | 366  | 47.317500     | 122.246861     | 608           |
|                            |     |             | 367  | 47.317694     | 122.247056     | 608           |
|                            |     |             | 369  | 47.249500     | 122.128889     | 415           |
|                            |     |             | 375  | 47.248250     | 122.152861     | 398           |
|                            |     |             | 408  | 47.273806     | 122.190694     | 364           |
|                            |     |             | 409  | 47.273833     | 122.190778     | 364           |
|                            |     |             | 446  | 47.876583     | 122.941889     | 415           |
|                            |     |             | 447  | 47.310000     | 122.145194     | 470           |
|                            |     |             | 457  | 47.309944     | 122.145361     | 470           |
| Dahewan, Inner<br>Mongolia | NZD | 25          | 322  | 47.821972     | 123.019833     | 319           |
|                            |     |             | 324  | 47.822639     | 123.018139     | 319           |

| Population       | ID | Sample size | Code | Latitude (°N) | Longitude (°E) | Elevation (m) |
|------------------|----|-------------|------|---------------|----------------|---------------|
|                  |    |             | 325  | 47.823528     | 123.016861     | 319           |
|                  |    |             | 328  | 47.823444     | 123.016528     | 318           |
|                  |    |             | 380  | 47.822194     | 123.019083     | 319           |
|                  |    |             | 381  | 47.821500     | 123.020556     | 319           |
|                  |    |             | 382  | 47.822806     | 123.017306     | 319           |
|                  |    |             | 401  | 47.822000     | 123.019278     | 319           |
|                  |    |             | 403  | 47.822306     | 123.019722     | 319           |
|                  |    |             | 404  | 47.822167     | 123.019639     | 319           |
|                  |    |             | 405  | 47.823306     | 123.017889     | 319           |
|                  |    |             | 406  | 47.967528     | 122.903083     | 375           |
|                  |    |             | 442  | 47.822056     | 123.019056     | 319           |
|                  |    |             | 443  | 47.875333     | 122.945139     | 364           |
|                  |    |             | 450  | 47.876333     | 122.946250     | 364           |
|                  |    |             | 451  | 47.967222     | 122.903056     | 375           |
|                  |    |             | 453  | 47.823389     | 123.016583     | 318           |
|                  |    |             | 454  | 47.822194     | 123.019500     | 319           |
|                  |    |             | 455  | 47.823194     | 123.017500     | 319           |
|                  |    |             | 459  | 47.875417     | 122.945083     | 364           |
|                  |    |             | 460  | 47.821861     | 123.019361     | 319           |
|                  |    |             | 462  | 47.822306     | 123.019667     | 319           |
|                  |    |             | 463  | 47.823056     | 123.018361     | 319           |
|                  |    |             | 464  | 47.822167     | 123.018917     | 319           |
|                  |    |             | 466  | 47.876583     | 122.941889     | 364           |
| Zabaykalsky Krai | R  | 14          | 501  | 53.097896     | 117.520379     | 714           |
|                  |    |             | 502  | 53.091380     | 117.548996     | 672           |
|                  |    |             | 503  | 53.087821     | 117.576059     | 654           |

| Population      | ID | Sample size | Code | Latitude (°N) | Longitude (°E) | Elevation (m) |
|-----------------|----|-------------|------|---------------|----------------|---------------|
|                 |    |             | 504  | 53.079790     | 117.570590     | 676           |
|                 |    |             | 505  | 53.063307     | 117.589201     | 822           |
|                 |    |             | 506  | 53.055877     | 117.564948     | 938           |
|                 |    |             | 507  | 53.050105     | 117.546283     | 939           |
|                 |    |             | 508  | 53.046842     | 117.517194     | 932           |
|                 |    |             | 509  | 53.053131     | 117.493882     | 814           |
|                 |    |             | 510  | 53.076792     | 117.474288     | 683           |
|                 |    |             | 513  | 52.991522     | 116.936739     | 835           |
|                 |    |             | 516  | 52.964459     | 116.970742     | 731           |
|                 |    |             | 517  | 52.942795     | 116.921258     | 762           |
|                 |    |             | 518  | 52.959207     | 116.841971     | 683           |
| Luanping, Hebei | HL | 10          | 630  | 40.816672     | 117.179761     | 463           |
|                 |    |             | 631  | 40.816739     | 117.179792     | 463           |
|                 |    |             | 632  | 40.816886     | 117.179892     | 463           |
|                 |    |             | 633  | 40.817042     | 117.180139     | 463           |
|                 |    |             | 634  | 40.817022     | 117.180153     | 463           |
|                 |    |             | 636  | 40.816858     | 117.179464     | 463           |
|                 |    |             | 637  | 40.816961     | 117.179417     | 463           |
|                 |    |             | 638  | 40.816772     | 117.179556     | 463           |
|                 |    |             | 640  | 40.788853     | 116.991017     | 479           |
|                 |    |             | 641  | 40.788839     | 116.990131     | 479           |
| Weichang, Hebei | HW | 17          | 645  | 41.745672     | 117.069278     | 1092          |
|                 |    |             | 646  | 41.745917     | 117.069239     | 1092          |
|                 |    |             | 647  | 41.745964     | 117.066889     | 1092          |
|                 |    |             | 648  | 41.745914     | 117.068661     | 1092          |
|                 |    |             | 649  | 41.745878     | 117.068456     | 1092          |

| Population    | ID | Sample size | Code | Latitude (°N) | Longitude (°E) | Elevation (m) |
|---------------|----|-------------|------|---------------|----------------|---------------|
|               |    |             | 650  | 41.745611     | 117.068047     | 1092          |
|               |    |             | 651  | 41.746133     | 117.068628     | 1092          |
|               |    |             | 652  | 41.746197     | 117.068833     | 1092          |
|               |    |             | 653  | 41.746172     | 117.068861     | 1092          |
|               |    |             | 654  | 41.746575     | 117.069044     | 1092          |
|               |    |             | 656  | 41.737475     | 117.083367     | 1210          |
|               |    |             | 657  | 41.737425     | 117.083178     | 1160          |
|               |    |             | 658  | 41.737381     | 117.083089     | 1160          |
|               |    |             | 659  | 41.736175     | 117.078753     | 1160          |
|               |    |             | 660  | 41.736386     | 117.078492     | 1160          |
|               |    |             | 661  | 41.736439     | 117.076869     | 1160          |
|               |    |             | 662  | 41.736167     | 117.075892     | 1160          |
| Zhuolu, Hebei | HZ | 16          | 665  | 40.033050     | 115.413072     | 1224          |
|               |    |             | 666  | 40.035103     | 115.412764     | 1292          |
|               |    |             | 667  | 40.035108     | 115.412717     | 1292          |
|               |    |             | 668  | 40.035222     | 115.412836     | 1292          |
|               |    |             | 669  | 40.030833     | 115.394050     | 1229          |
|               |    |             | 670  | 40.030950     | 115.394089     | 1229          |
|               |    |             | 671  | 40.030969     | 115.394094     | 1229          |
|               |    |             | 672  | 40.031000     | 115.394131     | 1229          |
|               |    |             | 673  | 40.030992     | 115.393997     | 1229          |
|               |    |             | 675  | 40.031136     | 115.394528     | 1229          |
|               |    |             | 676  | 40.030783     | 115.393956     | 1229          |
|               |    |             | 677  | 40.029639     | 115.389697     | 1249          |
|               |    |             | 678  | 40.029600     | 115.389778     | 1249          |
|               |    |             | 679  | 40.029606     | 115.389492     | 1249          |

| Population | ID | Sample size | Code | Latitude (°N) | Longitude (°E) | Elevation (m) |
|------------|----|-------------|------|---------------|----------------|---------------|
|            |    |             | 680  | 40.029478     | 115.386239     | 1249          |
|            |    |             | 681  | 40.029317     | 115.386078     | 1249          |

Table S2 The matrix of pairwise  $F_{ST}$  among populations

| Population | LK    | LC    | LB    | NA    | NZW   | NZD   | R     | HL    | HW    | HZ |
|------------|-------|-------|-------|-------|-------|-------|-------|-------|-------|----|
| LK         |       |       |       |       |       |       |       |       |       |    |
| LC         | 0.068 |       |       |       |       |       |       |       |       |    |
| LB         | 0.058 | 0.002 |       |       |       |       |       |       |       |    |
| NA         | 0.106 | 0.076 | 0.077 |       |       |       |       |       |       |    |
| NZW        | 0.077 | 0.090 | 0.056 | 0.141 |       |       |       |       |       |    |
| NZD        | 0.077 | 0.057 | 0.039 | 0.103 | 0.029 |       |       |       |       |    |
| R          | 0.210 | 0.281 | 0.214 | 0.287 | 0.190 | 0.219 |       |       |       |    |
| HL         | 0.226 | 0.235 | 0.182 | 0.320 | 0.112 | 0.141 | 0.415 |       |       |    |
| HW         | 0.237 | 0.253 | 0.197 | 0.319 | 0.122 | 0.139 | 0.401 | 0.011 |       |    |
| HZ         | 0.248 | 0.257 | 0.204 | 0.335 | 0.123 | 0.159 | 0.410 | 0.023 | 0.065 |    |



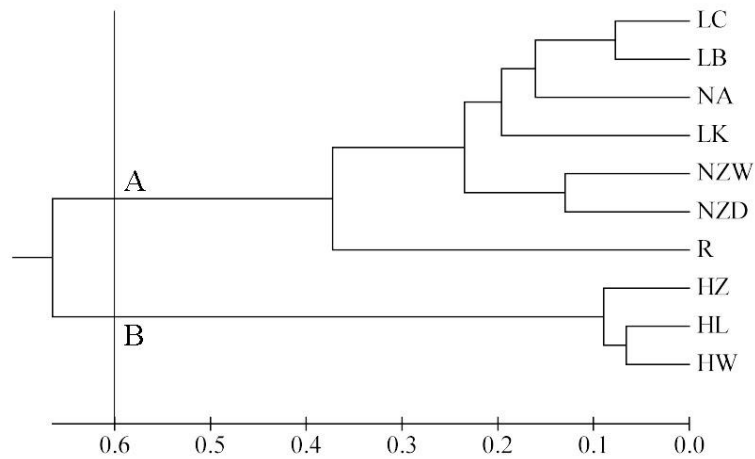

Fig.S1 A dendrogram of *Prunus sibirica* populations using unweighted pair group method with arithmetic means (UPGMA)

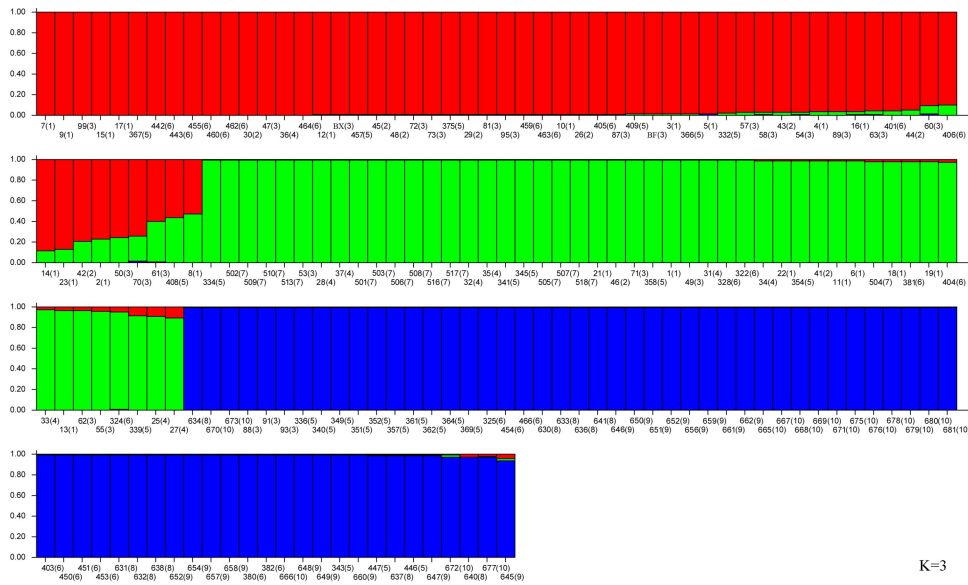

Fig.S2 A genetic structure analysis for 176 *Prunus sibirica* individuals based on Bayesian simulation ( $K = 3$ ). Different colors represent different components. The ordinate is the Q value, the abscissa is the code of the individual and their natural population. (1), (2), (3), (4), (5), (6), (7), (8), (9), and (10) represent LK, LC, LB, NA, NZW, NZD, R, HL, HW, and HZ, respectively

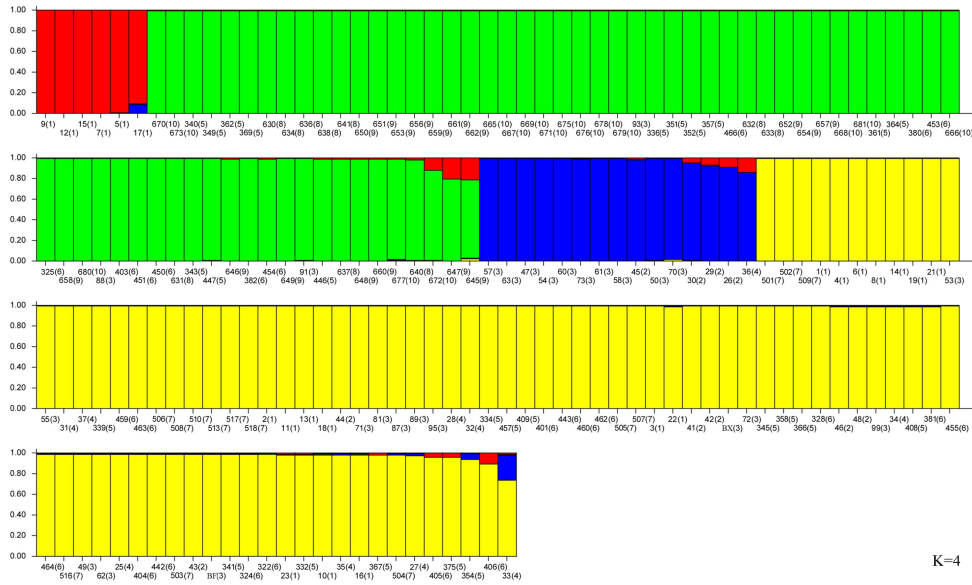

Fig.S3 A genetic structure analysis for 176 *Prunus sibirica* individuals based on Bayesian simulation (K = 4). Different colors represent different components. The ordinate is the Q value, the abscissa is the code of the individual and their natural population. (1), (2), (3), (4), (5), (6), (7), (8), (9), and (10) represent LK, LC, LB, NA, NZW, NZD, R, HL, HW, and HZ, respectively

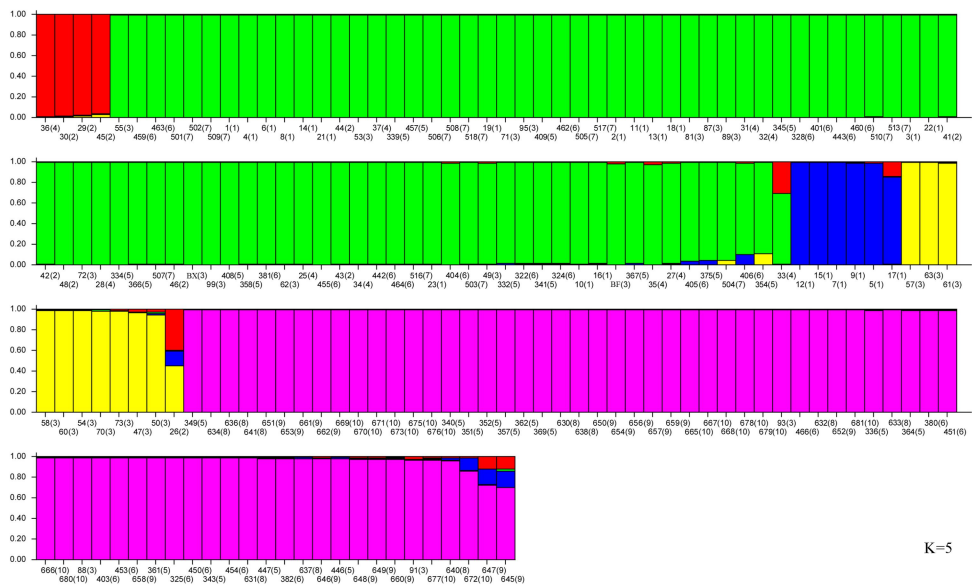

Fig.S4 A genetic structure analysis for 176 *Prunus sibirica* individuals based on Bayesian simulation (K = 5). Different colors represent different components. The ordinate is the Q value, the abscissa is the code of the individual and their natural population. (1), (2), (3), (4), (5), (6), (7), (8), (9), and (10) represent LK, LC, LB, NA, NZW, NZD, R, HL, HW, and HZ, respectively

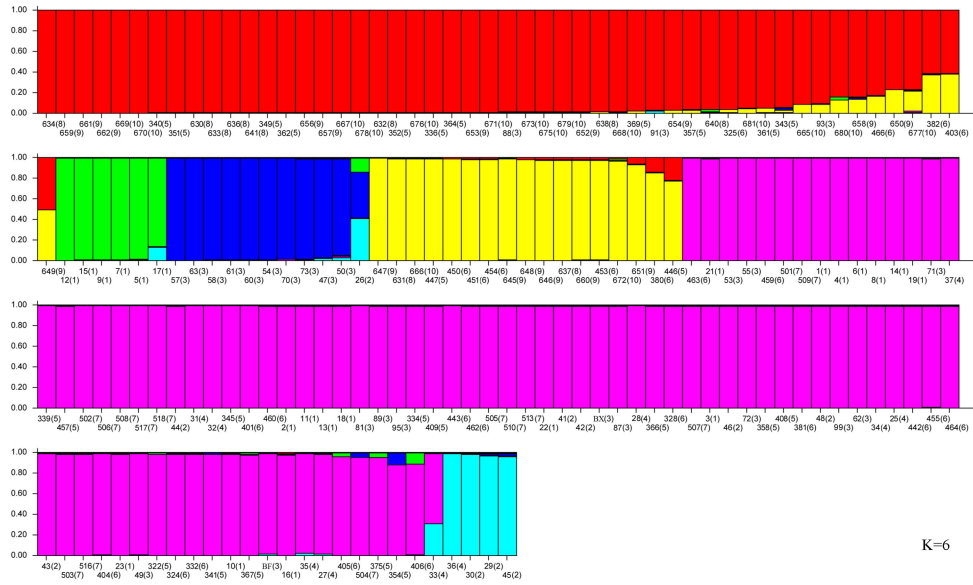

Fig.S5 A genetic structure analysis for 176 *Prunus sibirica* individuals based on Bayesian simulation ( $K = 6$ ). Different colors represent different components. The ordinate is the Q value, the abscissa is the code of the individual and their natural population. (1), (2), (3), (4), (5), (6), (7), (8), (9), and (10) represent LK, LC, LB, NA, NZW, NZD, R, HL, HW, and HZ, respectively

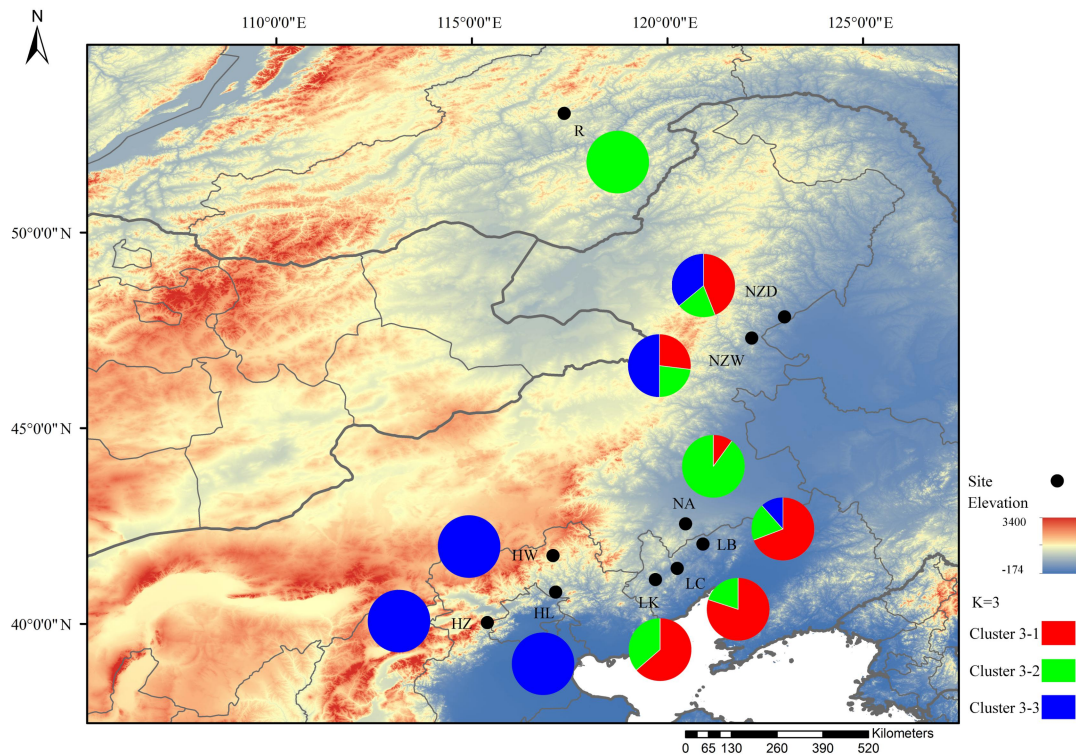

Fig.S6 The proportions of subgroup memberships in each of the 10 *Prunus sibirica* populations ( $K = 3$ ).

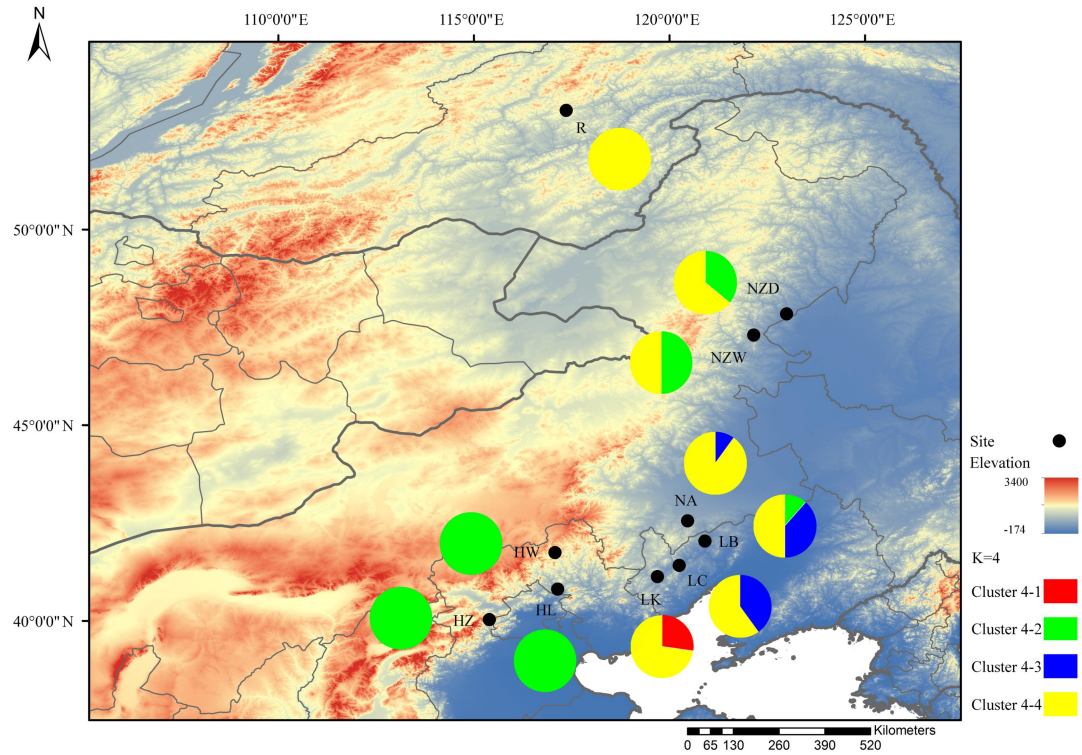

Fig.S7 The proportions of subgroup memberships in each of the 10 *Prunus sibirica* populations (K = 4).

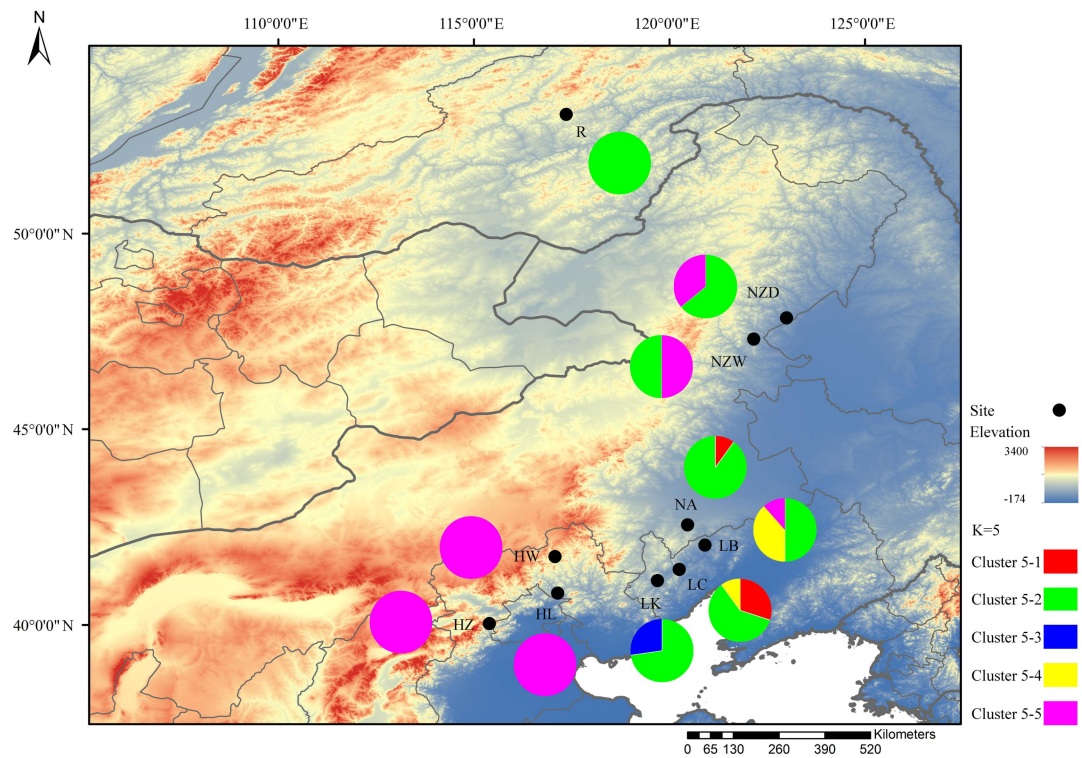

Fig.S8 The proportions of subgroup memberships in each of the 10 *Prunus sibirica* populations (K = 5).

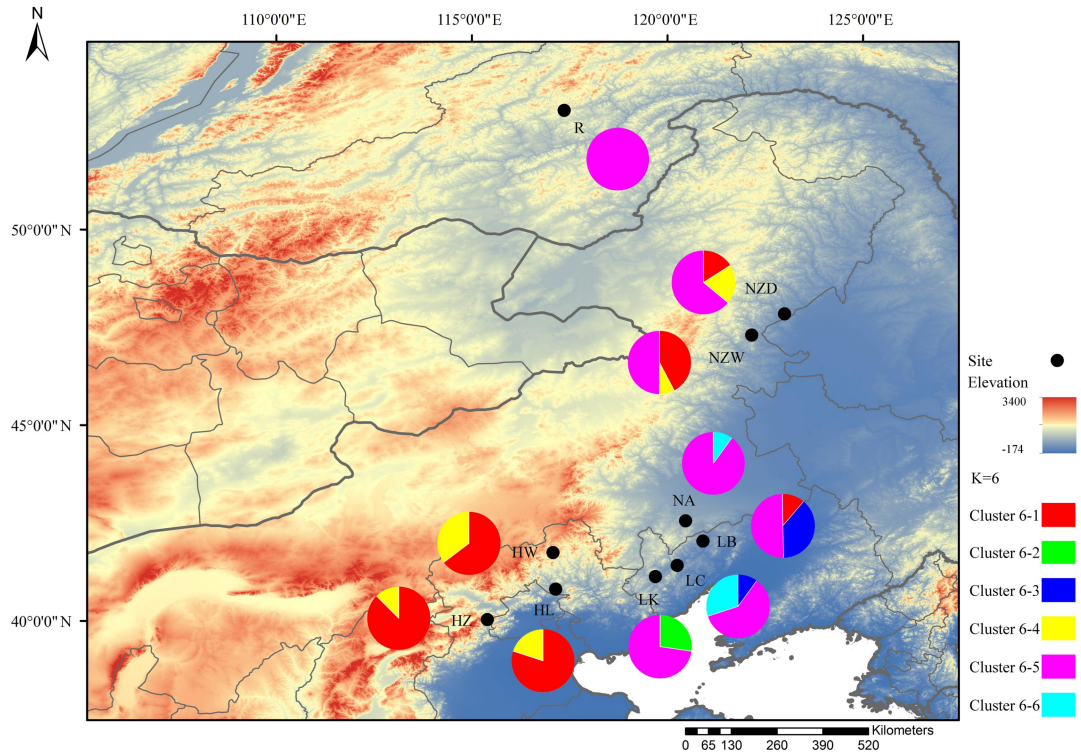

Fig.S9 The proportions of subgroup memberships in each of the 10 *Prunus sibirica* populations (K = 6).

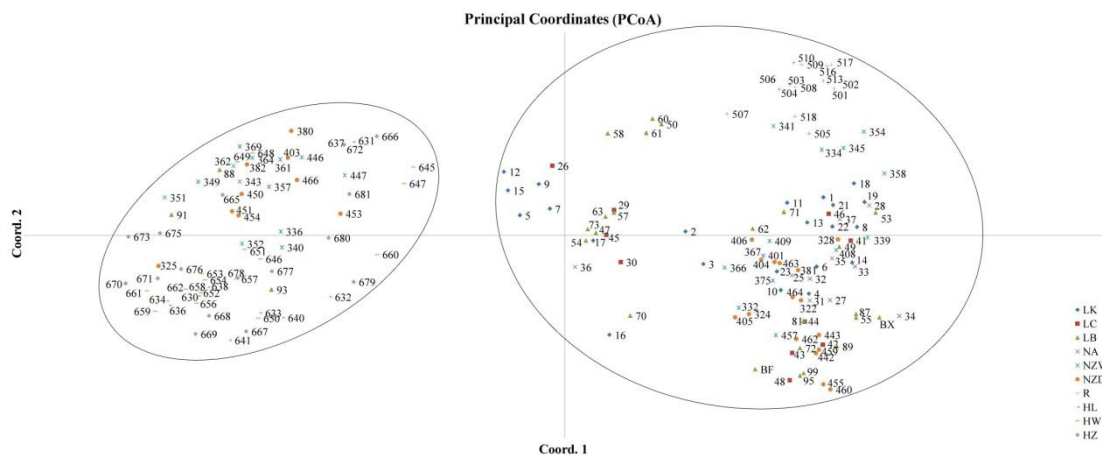

Fig.S10 Principal coordinate analysis (PCoA) of 176 *Prunus sibirica* individuals

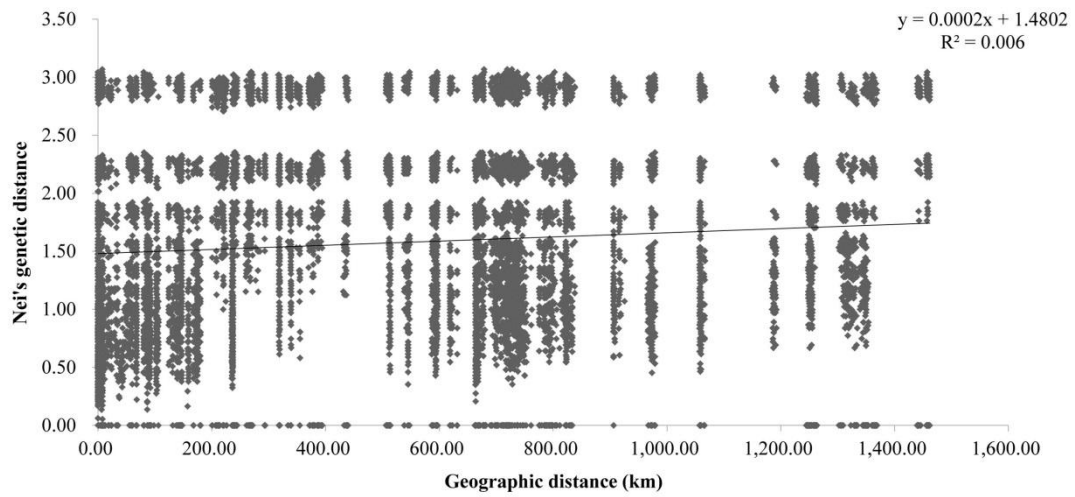

Fig.S11 Mantel test between genetic distance and geographic distance in 176 *Prunus sibirica* individuals

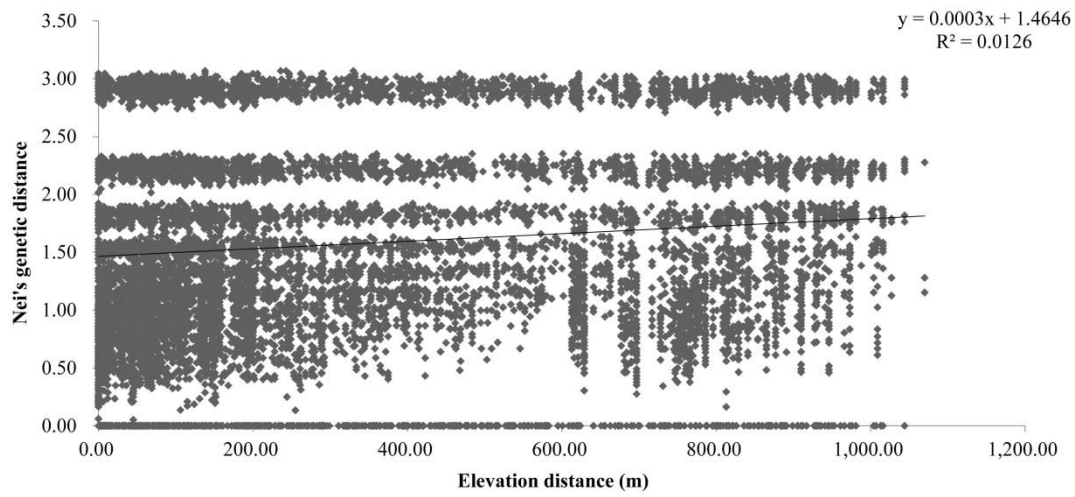

Fig.S12 Mantel test between genetic distance and elevation distribution in 176 *Prunus sibirica* individuals
